# Supplementary material for: Prevalence of cardiovascular risk factors according to Life's Essential 8 in children and adolescents during the COVID‐19 pandemic: A systematic review and meta‐analysis including 1 526 173 participants from 42 countries
Source: PubMed Central journal article supplement — Pediatr Obes. 2024 Nov 29;20(1):e13190. doi: 10.1111/ijpo.13190 (PMC11669839; doi:10.1111/ijpo.13190), 2024-11-29

# Online Supplement

**Prevalence of cardiovascular risk factors according to Life's Essential 8 in children and adolescents during the COVID-19 pandemic: A systematic review and meta-analysis including 1,526,173 participants from 42 countries.**

Rodrigo Núñez-Cortés<sup>1,2</sup>, Rubén López-Bueno<sup>3,4,5,\*</sup>, Rodrigo Torres-Castro<sup>1,6</sup>, Joaquín Calatayud<sup>4,5</sup>, Borja del Pozo Cruz<sup>7,8,9</sup>

<sup>1</sup>Department of Physical Therapy, Faculty of Medicine, University of Chile, Santiago, Chile.

<sup>2</sup>Physiotherapy in Motion Multispeciality Research Group (PTinMOTION), Department of Physiotherapy, University of Valencia, Valencia, Spain.

<sup>3</sup>Department of Physical Medicine and Nursing, University of Zaragoza, Spain.

<sup>4</sup>Exercise Intervention for Health Research Group (EXINH-RG), Department of Physiotherapy, University of Valencia, Spain.

<sup>5</sup>National Research Centre for the Working Environment, Copenhagen, Denmark.

<sup>6</sup>Department of Pulmonary Medicine, Hospital Clínic—Institut d'Investigacions Biomèdiques August Pi i Sunyer (IDIBAPS), University of Barcelona, Barcelona, Spain.

<sup>7</sup>Faculty of Education, University of Cádiz, Cádiz, Spain.

<sup>8</sup>Biomedical Research and Innovation Institute of Cádiz (INiBICA) Research Unit, Puerta del Mar University Hospital, University of Cádiz, Spain.

<sup>9</sup>Department of Sports Science and Clinical Biomechanics, University of Southern Denmark, Odense, Denmark.

**\*Corresponding author:** R. López-Bueno, University of Zaragoza, C/Domingo Miral, s/n 50009 Zaragoza. Phone: 976 76 17 19. E-mail: [rlopezbu@unizar.es](mailto:rlopezbu@unizar.es)

## **Table of contents**

eTable 1. Search strategy

eTable 2. Risk of bias assessment

eFigure 1. PRISMA Flow Diagram

eFigure 2. Doi plot for diabetes.

eFigure 3. Doi plot for sleep.

eFigure 4. Doi plot for obesity.

eFigure 5. Doi plot for physical activity.

eFigure 6. Doi plot for diet.

eFigure 7. Doi plot for smoking.

eFigure 8. Doi plot for dyslipidemia.

eFigure 9. Doi plot for EBP.

eFigure 10. Forest plot of prevalence of obesity by continent.

eFigure 11. Forest plot of prevalence of physical activity by continent.

eFigure 12. Forest plot of prevalence of sleep by continent.

eFigure 13. Forest plot of prevalence of smoking by continent.

eFigure 14. Forest plot of prevalence of obesity with high quality studies.

eFigure 15. Forest plot of prevalence of physical activity with high quality studies.

eFigure 16. Forest plot of prevalence of sleep with high quality studies.

eFigure 17. Forest plot of prevalence of smoking with high quality studies.

Online supplemental Table e1. Search strategy

| Database: PubMed (search engine of MEDLINE) |                                                                                                                                                                                                                                                                                                                                                                                                                                                                                                                                                                                                     |           |
|---------------------------------------------|-----------------------------------------------------------------------------------------------------------------------------------------------------------------------------------------------------------------------------------------------------------------------------------------------------------------------------------------------------------------------------------------------------------------------------------------------------------------------------------------------------------------------------------------------------------------------------------------------------|-----------|
| #                                           | Searches                                                                                                                                                                                                                                                                                                                                                                                                                                                                                                                                                                                            | Results   |
| 1                                           | "Prevalence"[MeSH Terms] OR "Prevalence"[Title/Abstract] OR "Prevalen*"                                                                                                                                                                                                                                                                                                                                                                                                                                                                                                                             | 1,022,952 |
| 2                                           | "Diet"[MeSH Terms] OR "Diet"[Title/Abstract] OR "Physical activity"[Title/Abstract] OR "Nicotine exposure"[Title/Abstract] OR "Tobacco"[MeSH Terms] OR "Tobacco"[Title/Abstract] OR "Sleep"[MeSH Terms] OR "Sleep"[Title/Abstract] OR "Body Mass Index"[MeSH Terms] OR "Body Mass Index"[Title/Abstract] OR "Blood lipids"[Title/Abstract] OR "Non-HDL cholesterol"[Title/Abstract] OR "Blood glucose"[MeSH Terms] OR "Blood glucose"[Title/Abstract] OR "Arterial Pressure"[MeSH Terms] OR "Blood Pressure"[MeSH Terms] OR "Arterial Pressure"[Title/Abstract] OR "Blood Pressure"[Title/Abstract] | 1,845,640 |
| 3                                           | #1 AND #2                                                                                                                                                                                                                                                                                                                                                                                                                                                                                                                                                                                           | 150,804   |
| 4                                           | <i>Filters applied: Observational Study, Child: birth-18 years, Humans.</i>                                                                                                                                                                                                                                                                                                                                                                                                                                                                                                                         | 777       |
| 5                                           | Dates: 2020 to February 24, 2023                                                                                                                                                                                                                                                                                                                                                                                                                                                                                                                                                                    | 244       |

| Database: Scopus |                                                                                                                                                                                                                                                                                                                                                             |         |
|------------------|-------------------------------------------------------------------------------------------------------------------------------------------------------------------------------------------------------------------------------------------------------------------------------------------------------------------------------------------------------------|---------|
| #                | Searches                                                                                                                                                                                                                                                                                                                                                    | Results |
| 1                | ( TITLE-ABS-KEY (prevalen* ) ) AND ( TITLE-ABS-KEY (diet OR "physical activity" OR "nicotine exposure" OR "tobacco" OR "sleep" OR "body mass Index" OR "blood lipids" OR "non-HDL cholesterol" OR "blood glucose" OR "arterial pressure" OR "blood pressure") ) AND ( TITLE-ABS-KEY ("observational study") ) AND ( TITLE-ABS-KEY (child* OR adolescents) ) | 1,783   |
| 2                | <i>Filters applied: Article, Human.</i>                                                                                                                                                                                                                                                                                                                     | 1,545   |
| 3                | Dates: 2020 to February 24, 2023                                                                                                                                                                                                                                                                                                                            | 221     |

| Database: Web of Science (WOS) |                                                                                                                                                                                                                                                                                                                                                                                           |         |
|--------------------------------|-------------------------------------------------------------------------------------------------------------------------------------------------------------------------------------------------------------------------------------------------------------------------------------------------------------------------------------------------------------------------------------------|---------|
| #                              | Searches                                                                                                                                                                                                                                                                                                                                                                                  | Results |
| 1                              | (Prevalen*) (All Fields) AND (Diet OR "Physical activity" OR "Nicotine exposure" OR Tobacco OR Sleep OR "Body Mass Index" OR "Blood lipids" OR "Non-HDL cholesterol" OR "Blood glucose" OR "Arterial Pressure" OR "Blood Pressure") (All Fields) AND ("Observational Study") (All Fields) AND (Child* OR Adolescents) (All Fields) AND NOT (Mouse OR Mice OR "Animal Model") (All Fields) | 1,303   |
| 2                              | <i>Filters applied: Article</i>                                                                                                                                                                                                                                                                                                                                                           | 1,074   |
|                                | Timespan: 2020-01-01 to 2023-02-24 (Publication Date)                                                                                                                                                                                                                                                                                                                                     | 369     |



|                   |   |   |   |   |   |   |   |   |   |   |
|-------------------|---|---|---|---|---|---|---|---|---|---|
| Łuszczk 2021      | Y | U | Y | Y | Y | Y | U | Y | U | 6 |
| Medrano 2020      | Y | Y | Y | Y | Y | Y | Y | Y | N | 8 |
| Mekkawy 2021      | Y | U | Y | Y | Y | Y | Y | Y | U | 7 |
| Metwally 2020     | Y | Y | Y | Y | Y | Y | Y | Y | U | 8 |
| Moore 2021        | Y | U | Y | Y | Y | Y | Y | Y | Y | 8 |
| Mulugeta 2021     | Y | U | Y | Y | Y | Y | Y | Y | U | 7 |
| Nyström 2020      | Y | U | U | Y | Y | Y | Y | Y | U | 6 |
| Okely 2021        | Y | U | Y | Y | Y | Y | Y | Y | Y | 8 |
| Palermi 2022      | Y | N | N | Y | Y | Y | Y | Y | Y | 7 |
| Parker 2021       | Y | Y | Y | Y | N | Y | Y | Y | N | 7 |
| Pelham 2021       | Y | U | Y | Y | Y | Y | U | Y | N | 6 |
| Pierce 2022       | Y | U | Y | Y | Y | Y | Y | Y | U | 7 |
| Puteikis 2022     | Y | N | Y | Y | N | Y | Y | Y | Y | 7 |
| Qiu 2021          | Y | Y | N | Y | Y | Y | Y | Y | N | 7 |
| Ranjbar 2021      | Y | U | Y | Y | Y | Y | Y | Y | Y | 8 |
| Rogés 2021        | Y | U | U | Y | Y | Y | Y | Y | N | 6 |
| Rojas 2022        | Y | Y | N | Y | N | Y | Y | Y | U | 6 |
| Ruíz-Roso 2020    | Y | N | N | Y | Y | Y | Y | Y | Y | 7 |
| Schmidt 2020      | Y | Y | Y | N | Y | Y | Y | Y | N | 7 |
| Shalitin 2022     | Y | U | Y | Y | Y | Y | Y | Y | U | 7 |
| Song 2023         | Y | U | Y | Y | Y | Y | Y | Y | U | 7 |
| Sugimoto 2022     | Y | N | Y | Y | Y | Y | Y | Y | Y | 8 |
| Sugimoto 2023     | Y | N | Y | Y | Y | Y | Y | Y | N | 7 |
| Tandon 2021       | Y | U | Y | Y | Y | Y | Y | Y | U | 7 |
| Tanveer 2022      | Y | N | U | Y | Y | Y | Y | Y | U | 6 |
| Thorisdottir 2021 | Y | U | Y | Y | Y | Y | Y | Y | Y | 8 |
| Top 2022          | Y | N | Y | Y | Y | Y | Y | Y | U | 7 |
| Yazew 2022        | Y | N | Y | Y | Y | Y | U | Y | U | 6 |
| Wang 2022         | Y | Y | Y | Y | Y | Y | Y | Y | Y | 9 |
| Wen 2021          | Y | Y | Y | N | Y | Y | Y | Y | U | 7 |
| Zengin 2020       | Y | U | N | Y | Y | Y | Y | Y | Y | 7 |
| Zhai 2021         | Y | U | Y | U | U | Y | Y | Y | U | 5 |
| Zhou 2021         | Y | U | Y | Y | N | Y | Y | Y | U | 6 |

Online supplemental eFigure2. PRISMA Flow Diagram

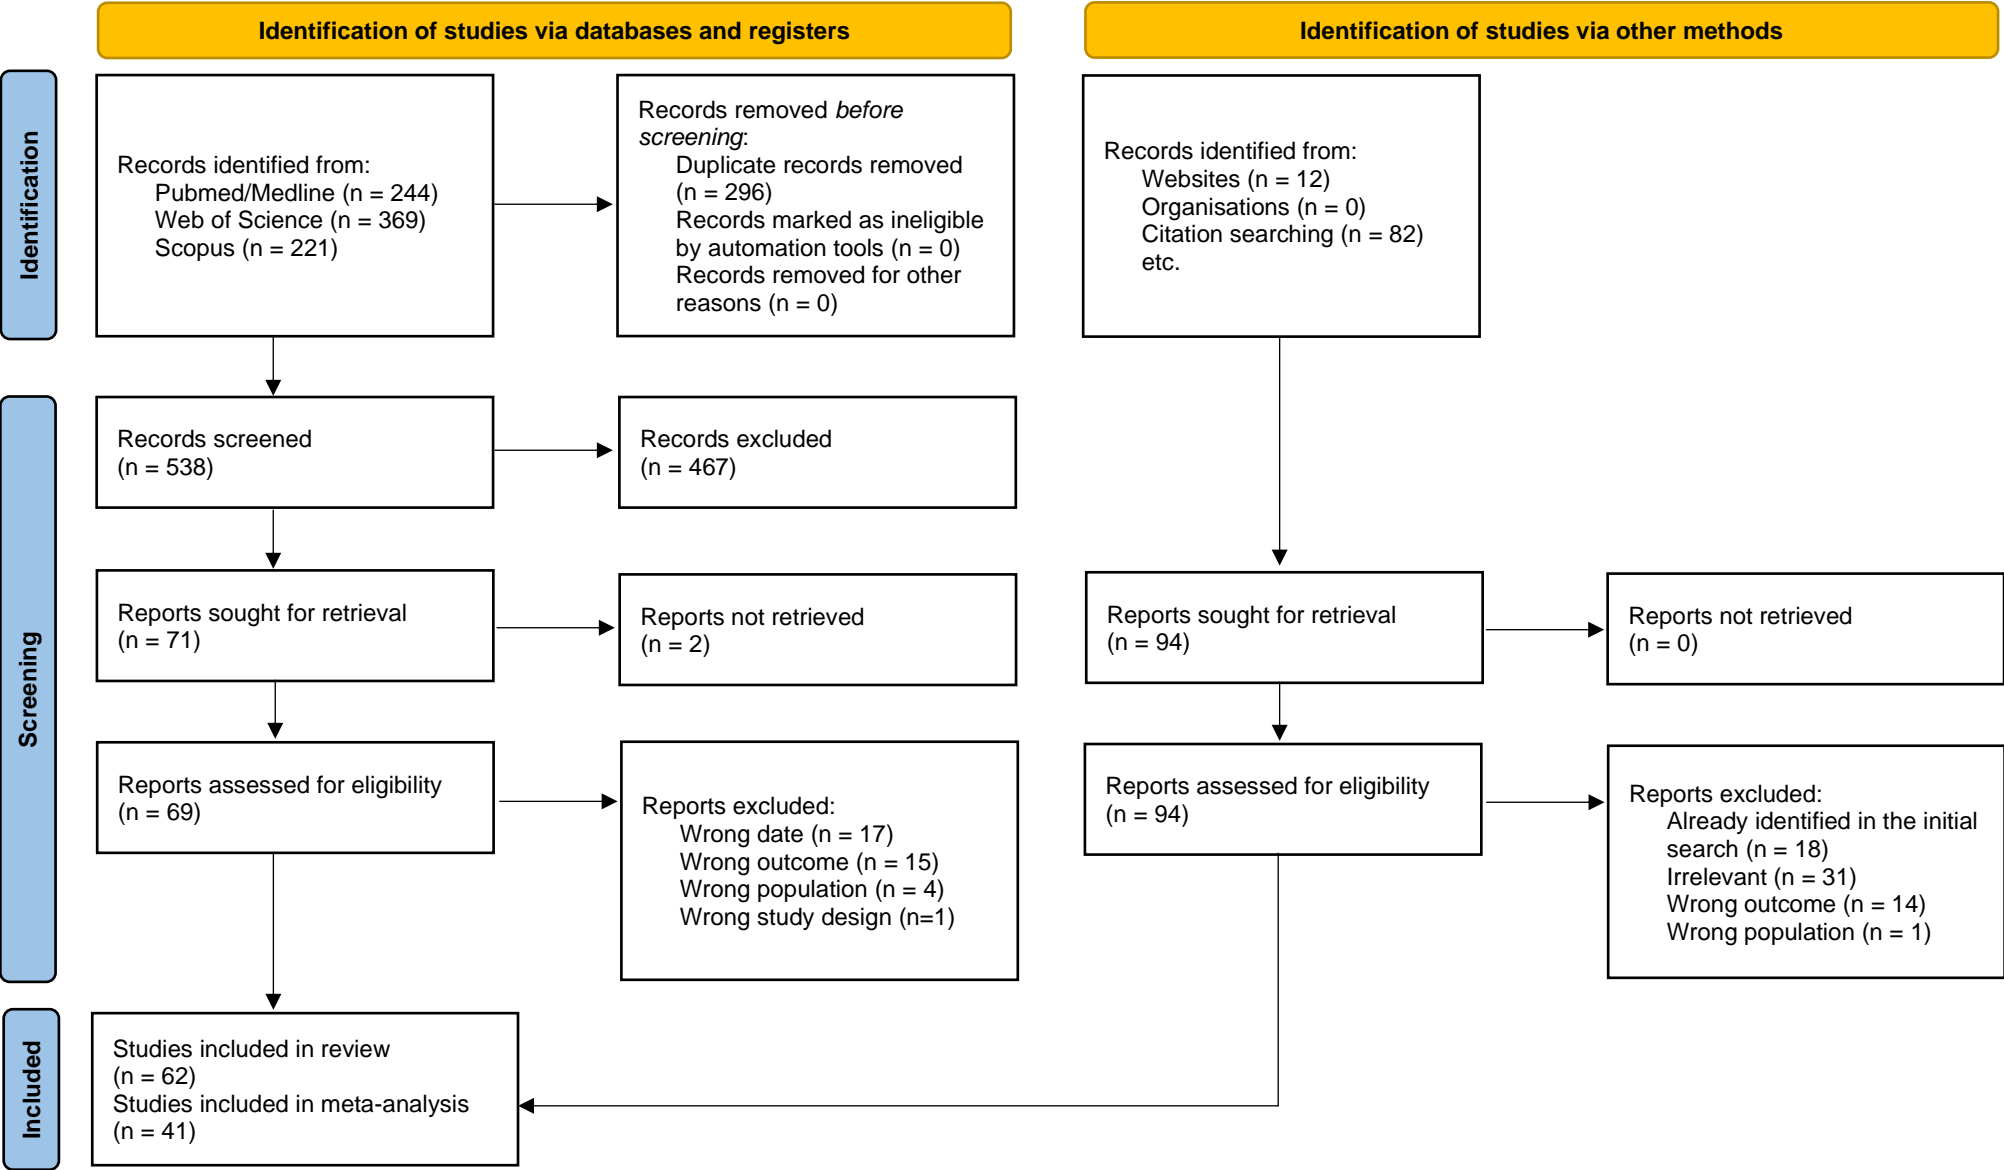

Online supplemental eFigure2. Doi plot for diabetes

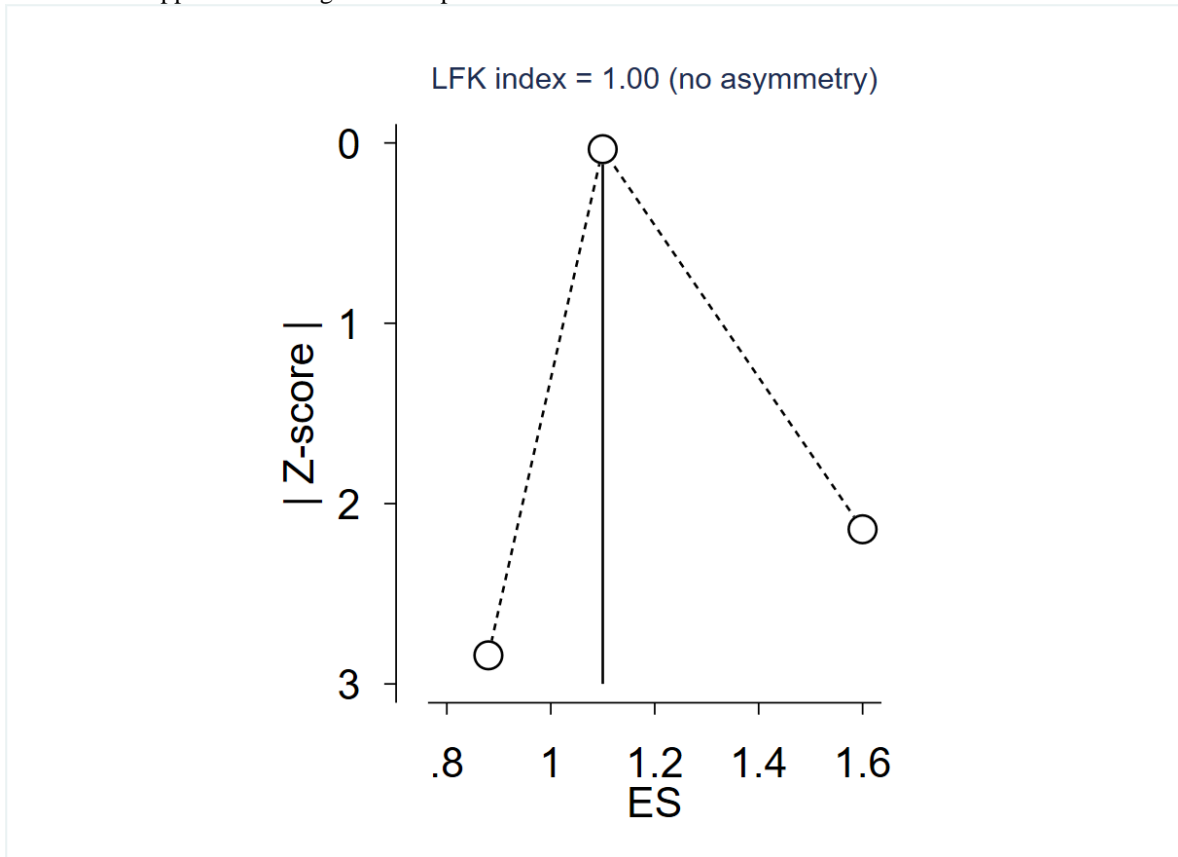

Online supplemental eFigure 3. Doi plot for sleep.

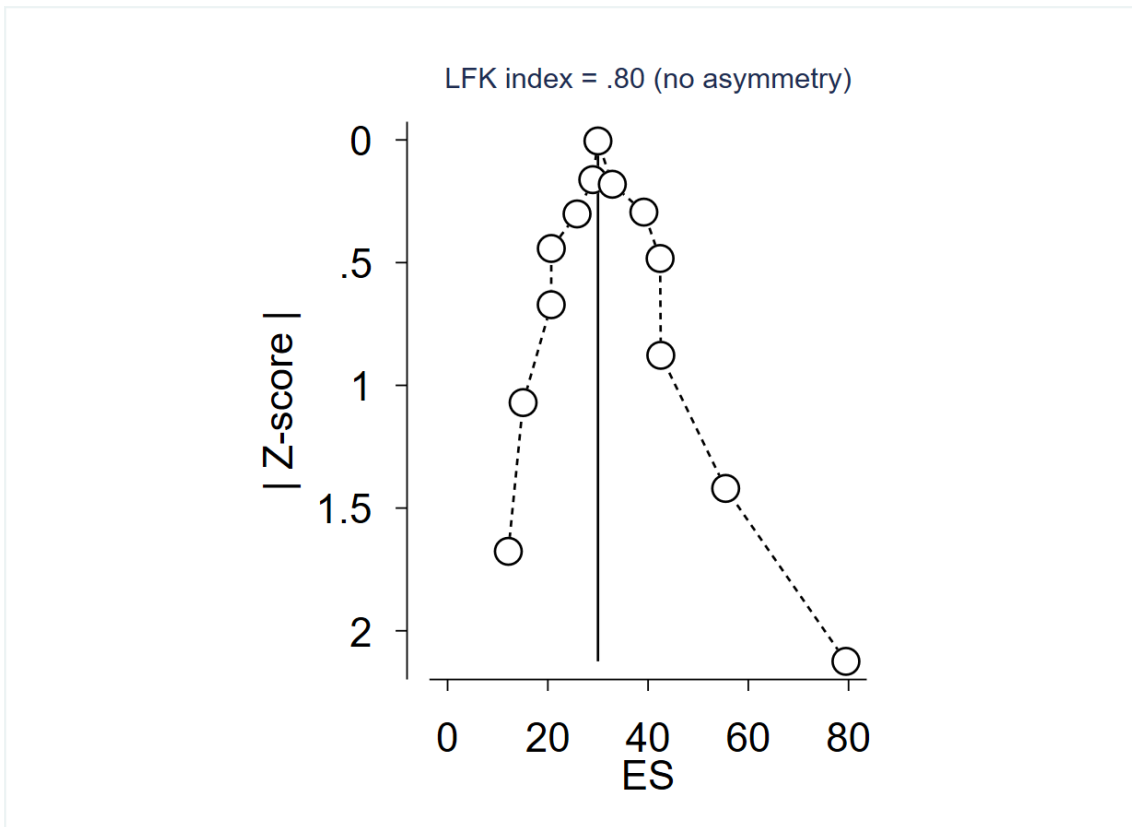



Online supplemental eFigure 4. Doi plot for obesity.

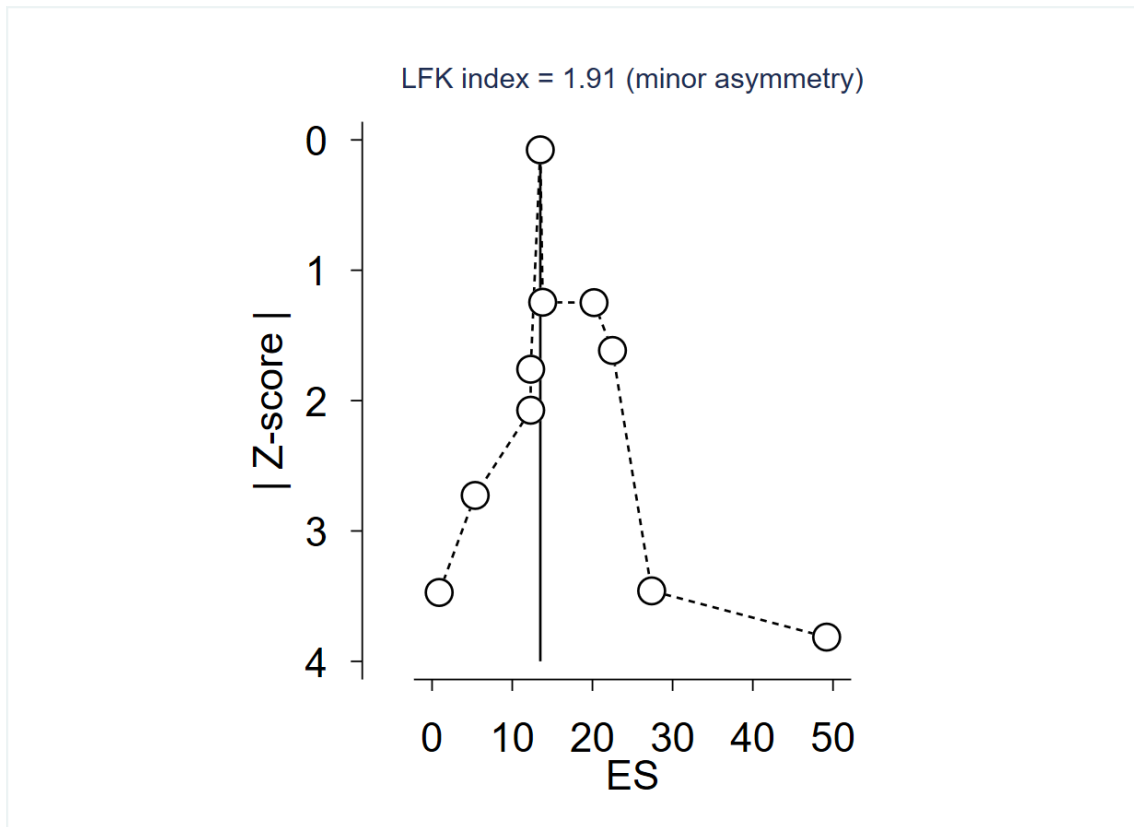

Online supplemental eFigure 5. Doi plot for physical activity.

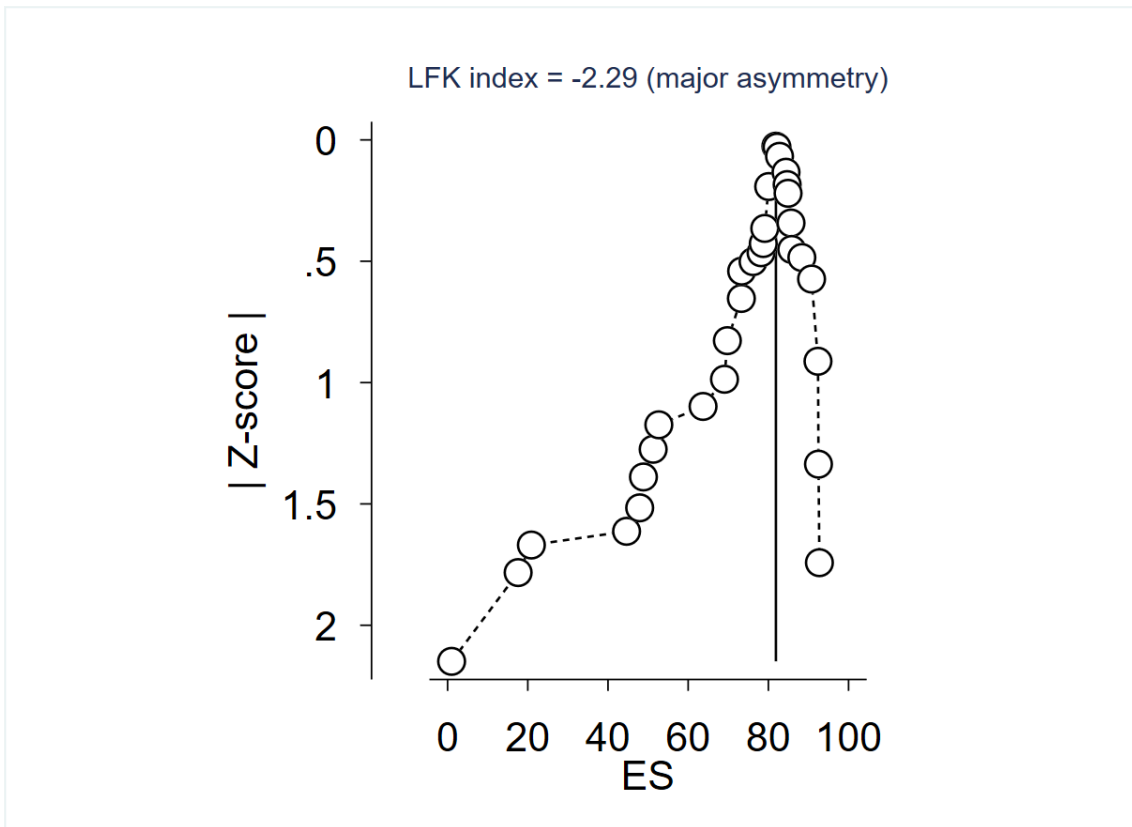

Online supplemental eFigure 6. Doi plot for diet.

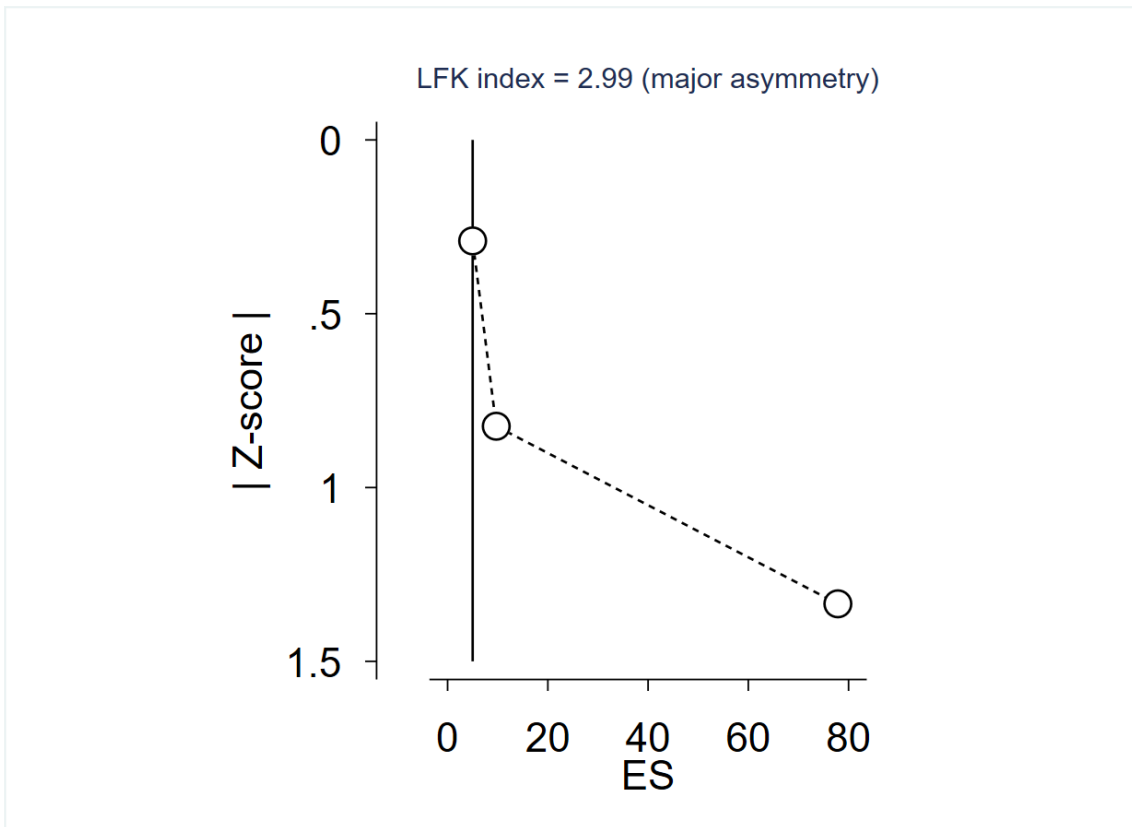

Online supplemental eFigure 7. Doi plot for smoking.

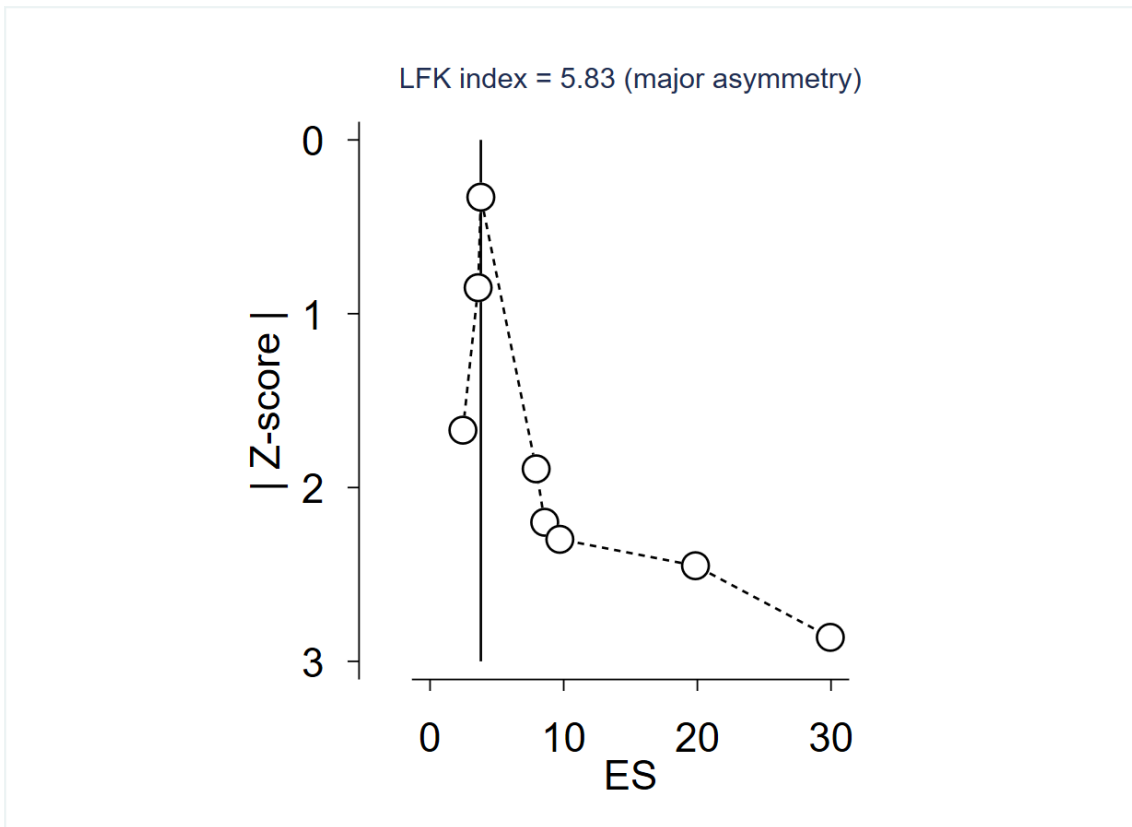

Online supplemental eFigure 8. Doi plot for dyslipidemia.

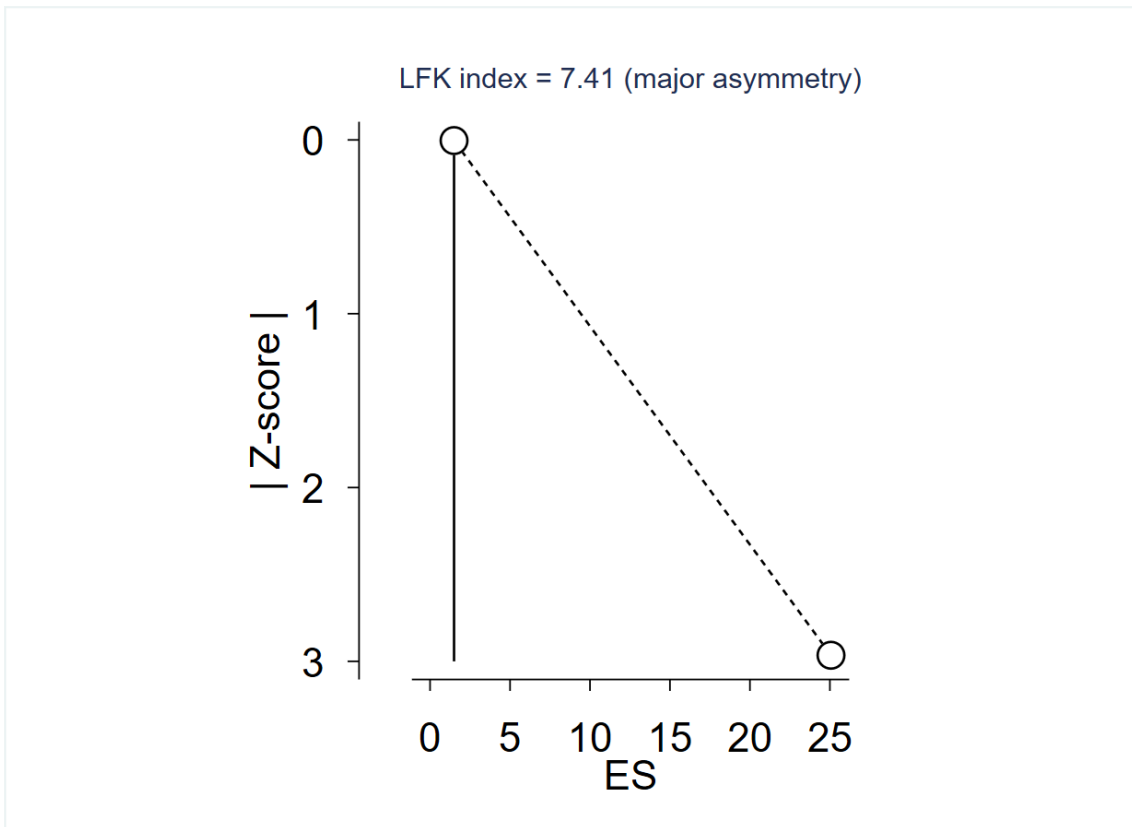

Online supplemental eFigure 9. Doi plot for EBP.

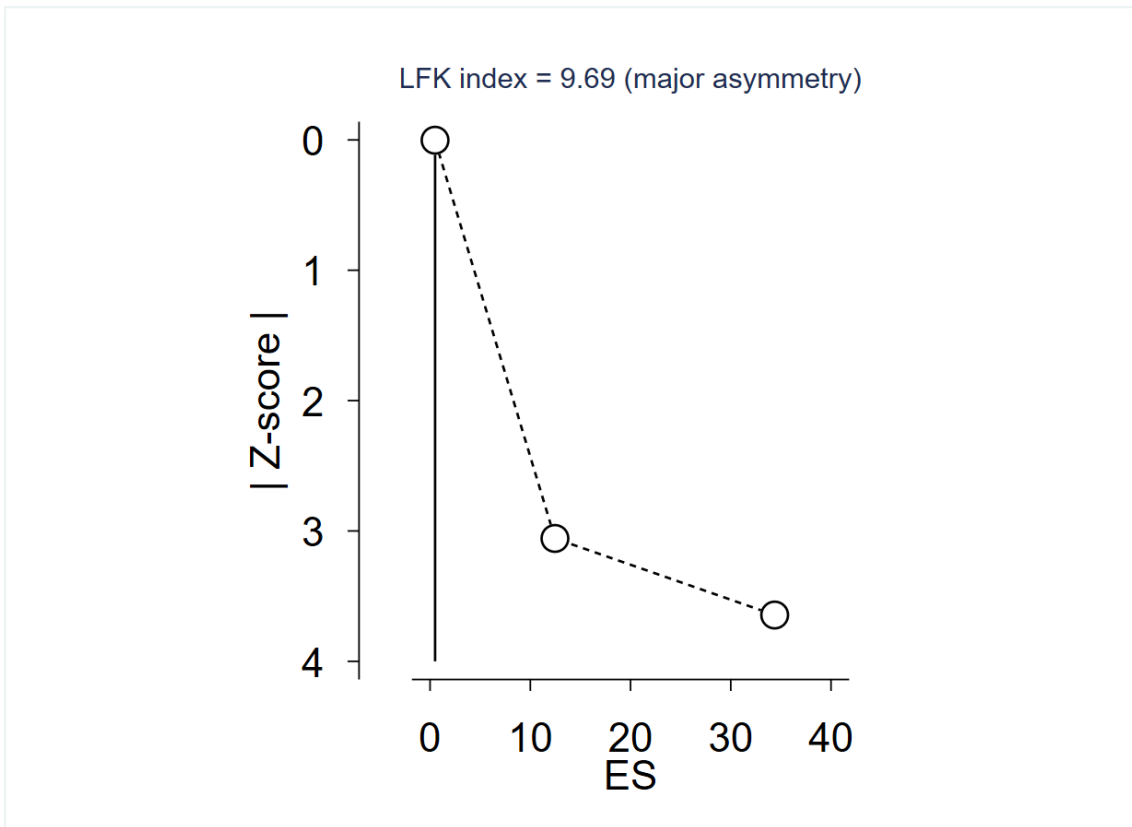

Online supplemental eFigure 10. Forest plot of prevalence of obesity by continent.

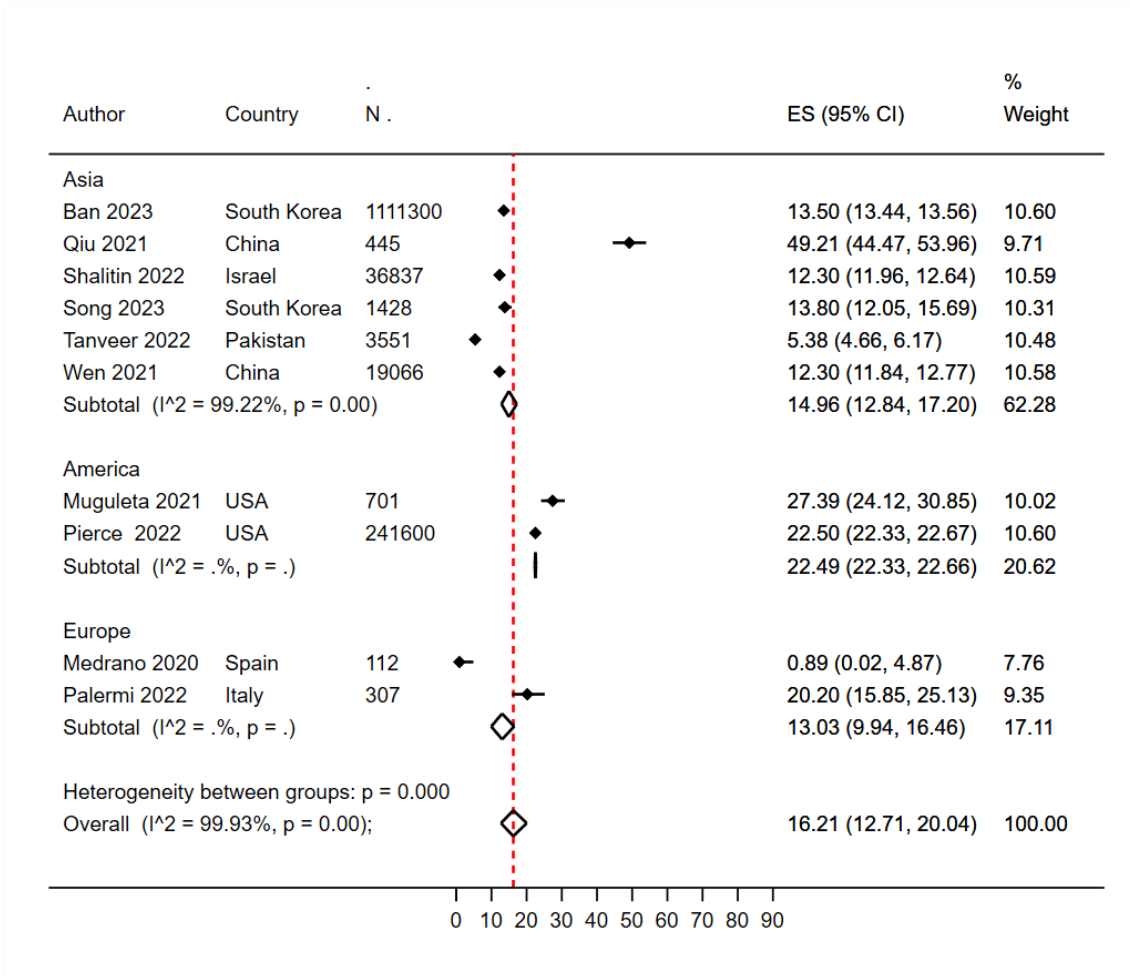

Online supplemental eFigure 11. Forest plot of prevalence of physical activity by continent.

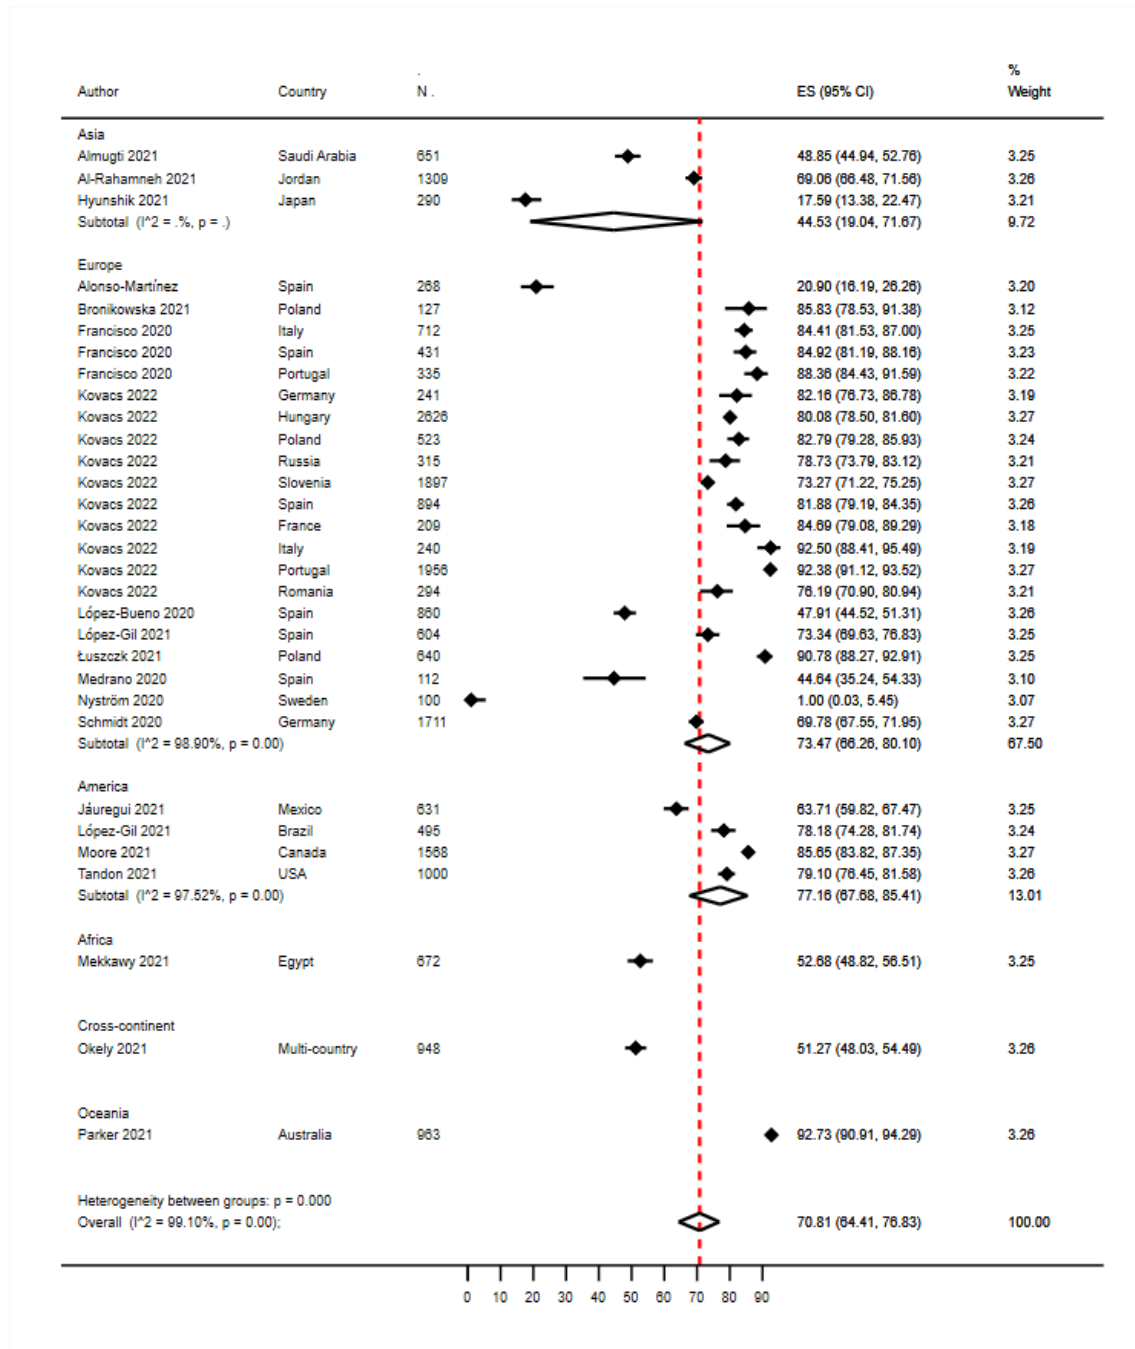



Online supplemental eFigure 12. Forest plot of prevalence of sleep health by continent.

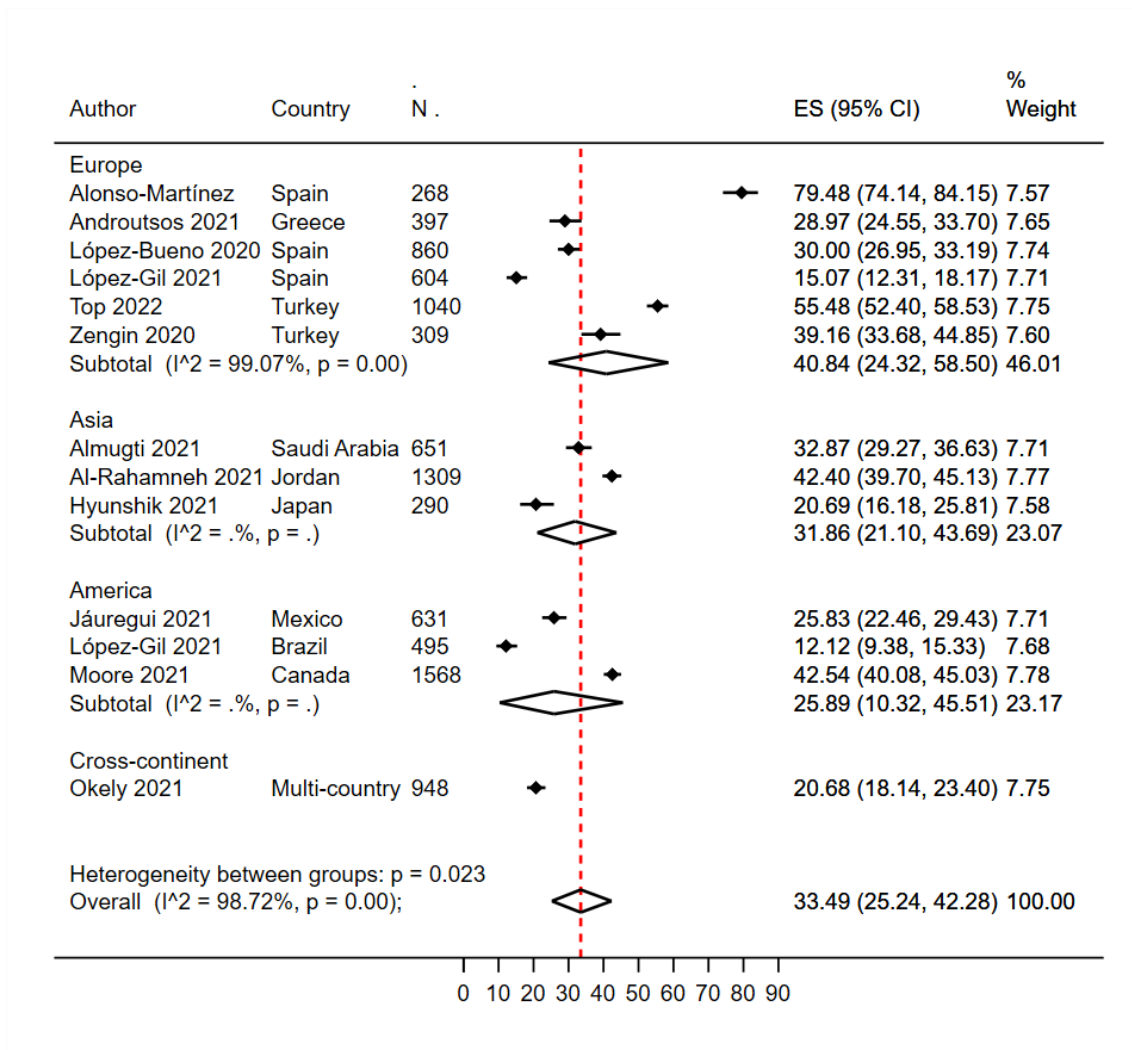

Online supplemental eFigure 13. Forest plot of prevalence of smoking by continent.

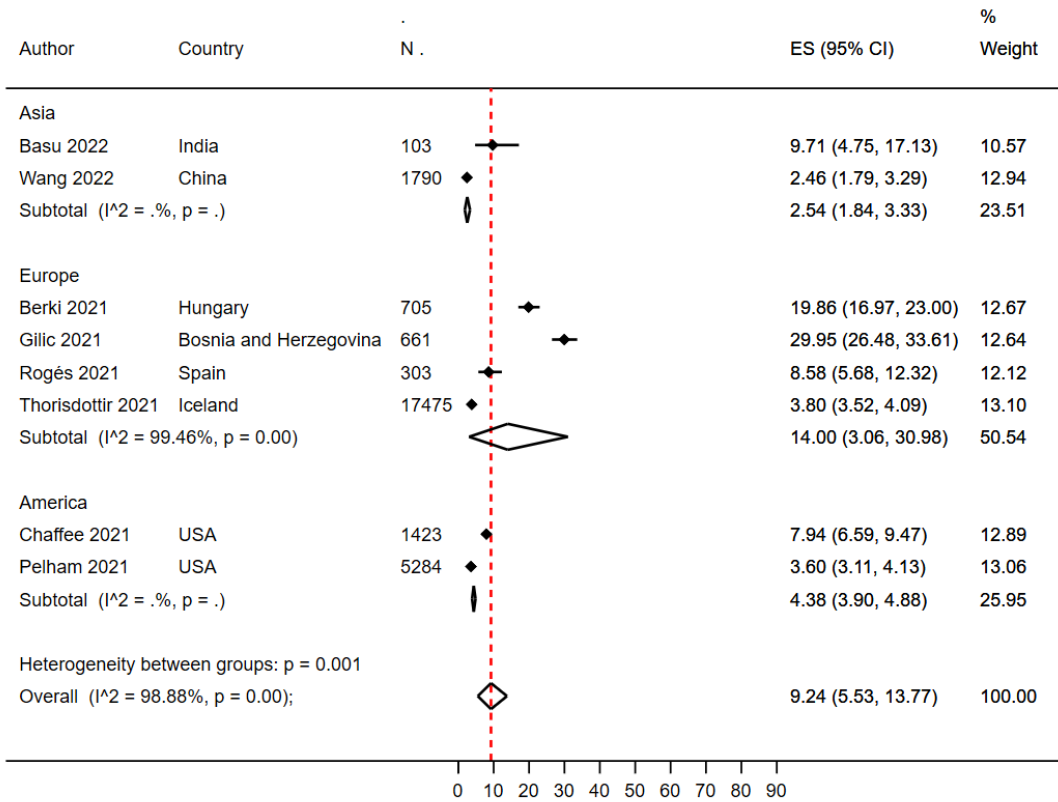

Online supplemental eFigure 14. Forest plot of prevalence of obesity with high quality studies.

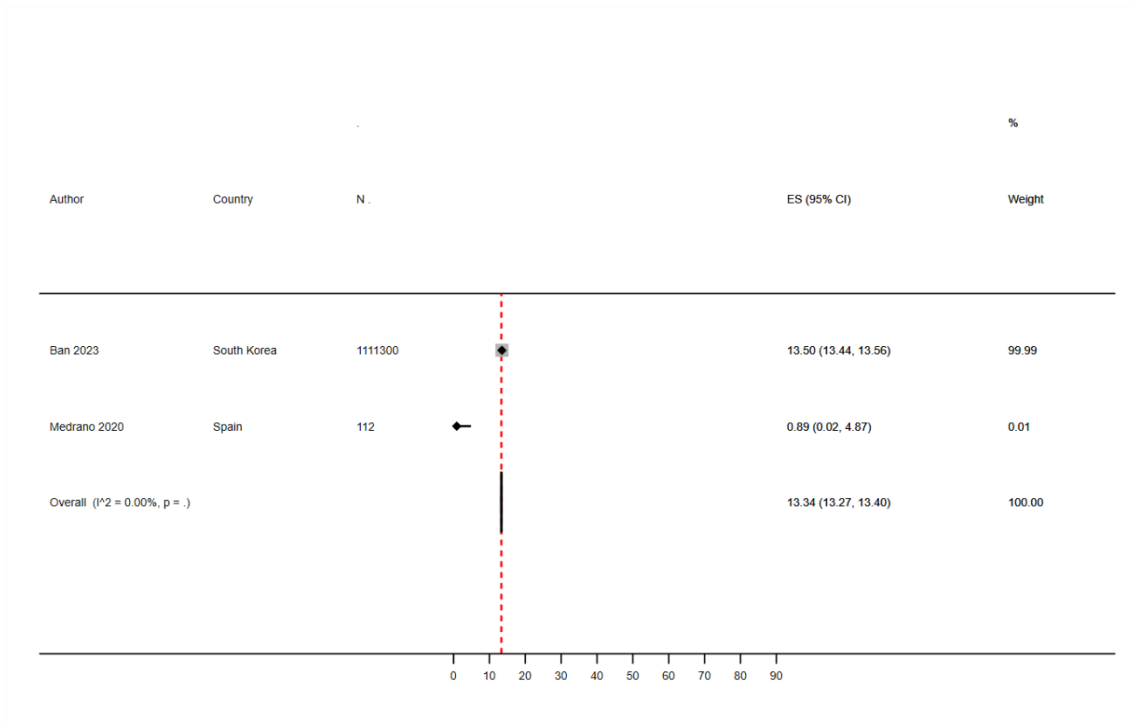

Online supplemental eFigure 15. Forest plot of prevalence of physical activity with high quality studies.

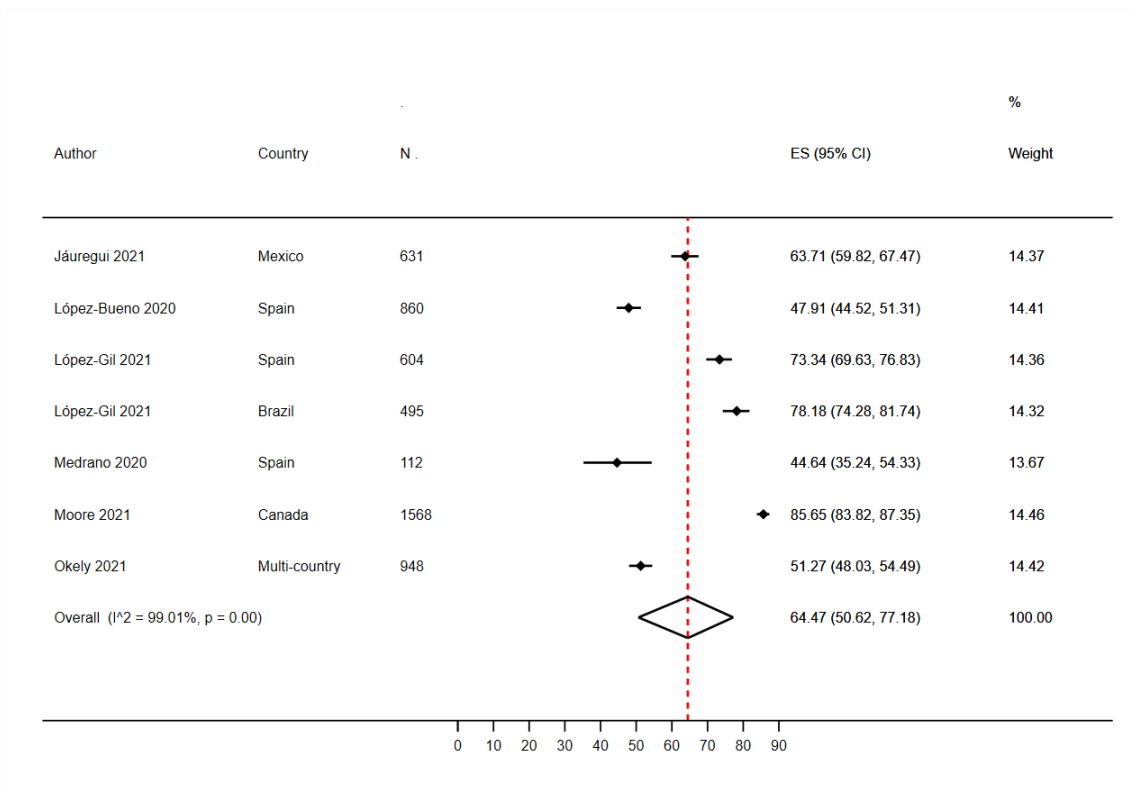

Online supplemental eFigure 16. Forest plot of prevalence of sleep with high quality studies.

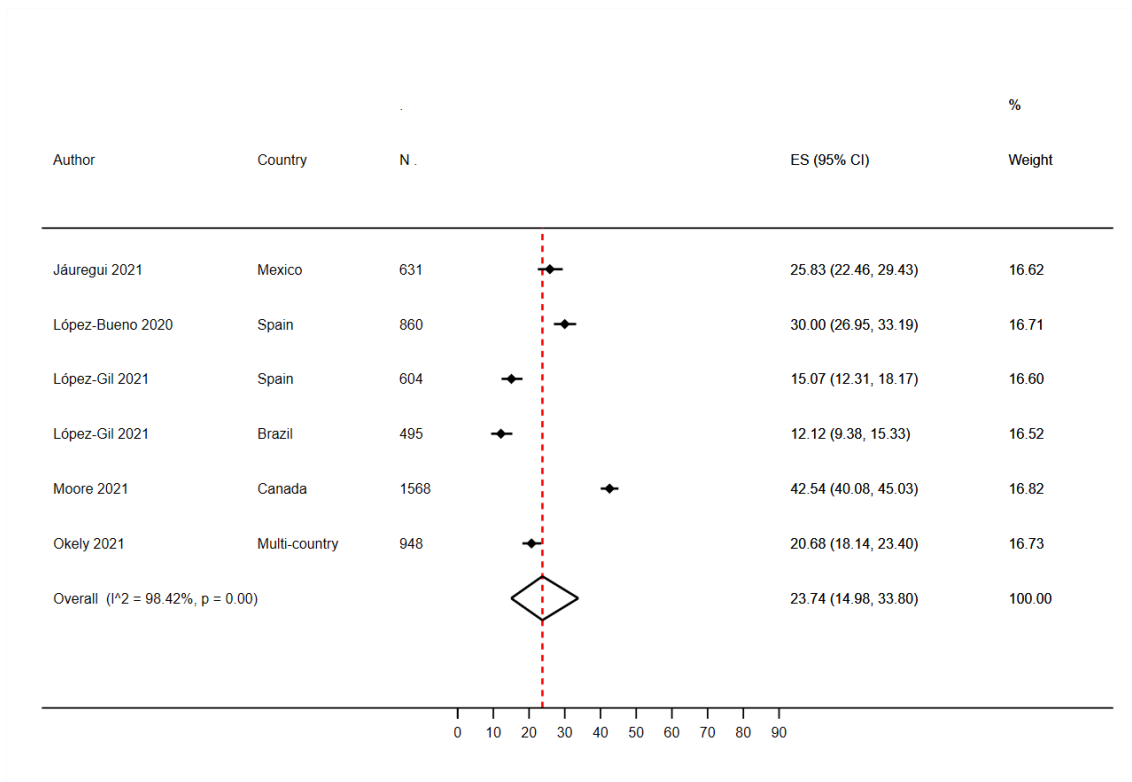

Online supplemental eFigure 17. Forest plot of prevalence of smoking with high quality studies.

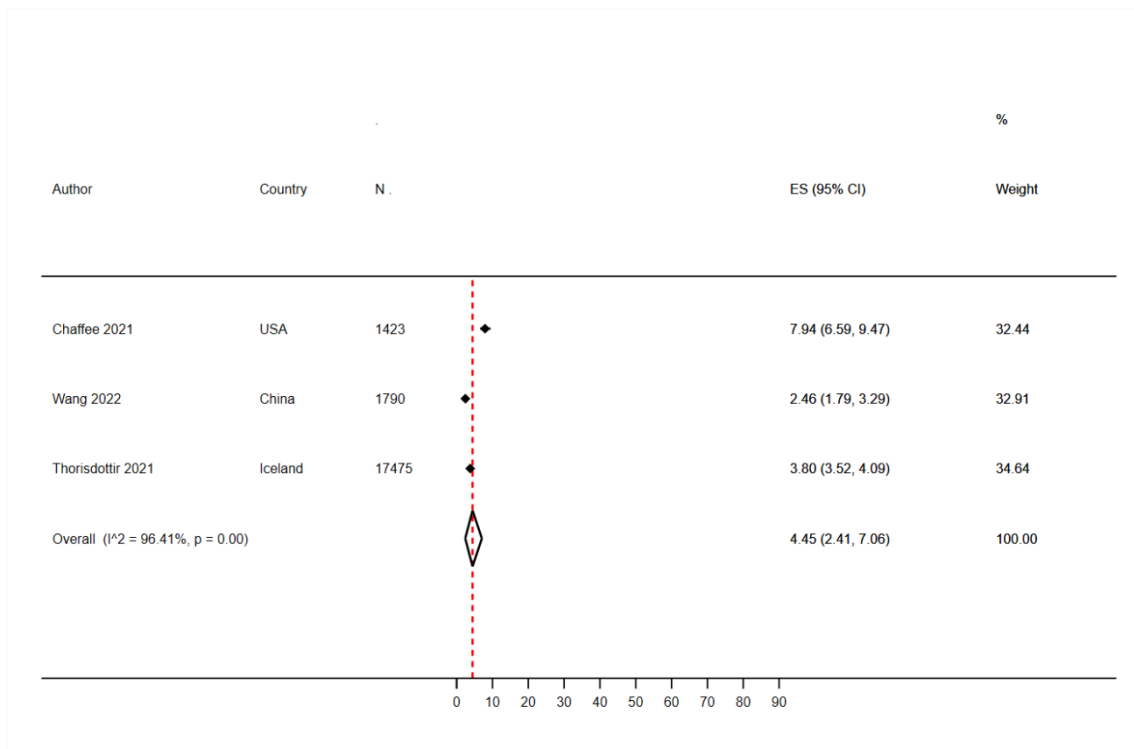

Supplement: IJPO-20-e13190-s001.pdf [file IJPO-20-e13190-s001.pdf]
